# Supplementary material for: Attempts to Access a Series of Pyrazoles Lead to New Hydrazones with Antifungal Potential against Candida species including Azole-Resistant Strains
Source: MDPI journal article supplement (doi:10.3390/molecules26195861), 2021-09-27
Supplement: s1 [file s1]

## Supplementary Materials

# Attempts to Access a Series of Pyrazoles Lead to New Hydrazones with Antifungal Potential against Candida Species Including Azole-Resistant Strains

Georgiana Negru 1, Laure Kamus 2, Elena Bîcu 1,\*, Sergiu Shova 3, Boualem Sendid 2, Faustine Dubar 2,\* and Alina Ghinet 1,4,5,\*

1 Faculty of Chemistry, "Alexandru Ioan Cuza" University of Iași, Bd. Carol I 11, 700506 Iași, Romania;

georgiana\_16\_95@yahoo.com

2 Inserm U1285, CHU Lille, UGSF UMR CNRS 8576, Glycobiology in Fungal and Clinical Applications,

Unité de Glycobiologie Structurale et Fonctionnelle, University of Lille, 59000 Lille, France; laurekamus@aol.com (L.K.); boualem.sendid@univ-lille.fr (B.S.)

3 "Petru Poni" Institute of Macromolecular Chemistry, 700487 Iasi, Romania; shova@icmpp.ro

4 Laboratory of Sustainable Chemistry and Health, Health and Environment Department, Junia, 59000 Lille, France

5 Inserm, CHU Lille, Institut Pasteur Lille, U1167—RID-AGE—Facteurs de Risque et Déterminants

Moléculaires des Maladies Liées au Vieillissement, University of Lille, 59000 Lille, France

\* Correspondence: elena@uaic.ro (E.B.); faustine.dubar@univ-lille.fr (F.D.); alina.ghinet@junia.com (A.G.)

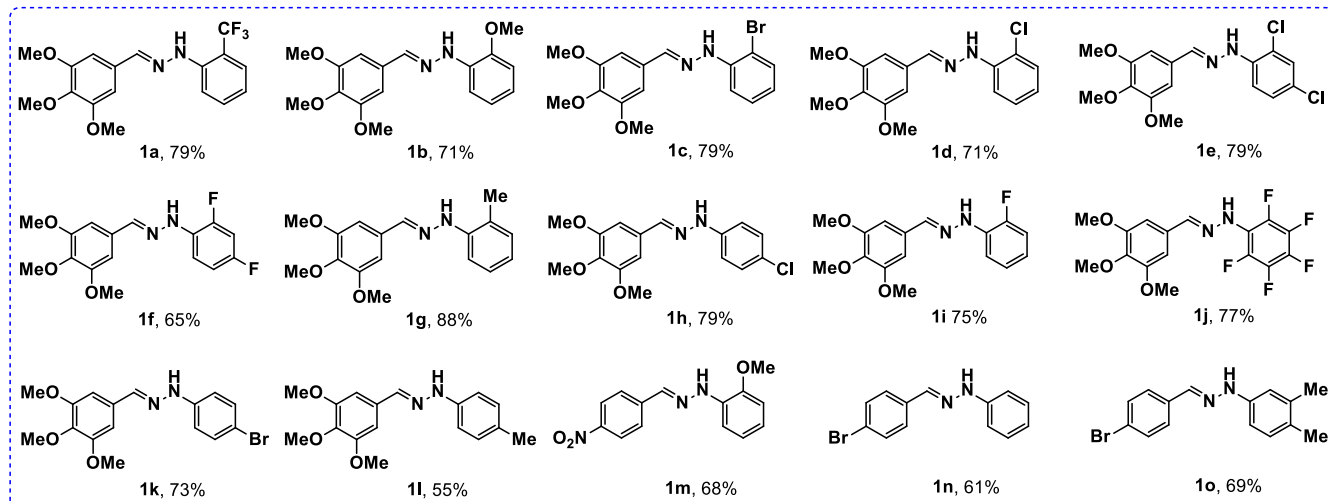

**Figure S1.** Structure of target hydrazones 1a-o

## X-ray crystallography

X-ray diffraction measurements for **1e** and **1i** were carried out with a Rigaku Oxford-Diffraction XCALIBUR E CCD diffractometer equipped with graphite-monochromated MoK $\alpha$  radiation. The unit cell determination and data integration were carried out using the CrysAlis package of Oxford Diffraction.<sup>1</sup> The structures were solved by Intrinsic Phasing using Olex2<sup>2</sup> software with the SHELXT<sup>3</sup> structure solution program and refined by full-matrix least-squares on  $F^2$  with SHELXL-2015<sup>4</sup> using an anisotropic model for non-hydrogen atoms. All H atoms attached to carbon were introduced in idealized positions ( $d_{\text{CH}} = 0.96 \text{ \AA}$ ) using the riding model with their isotropic displacement parameters fixed at 120% of their riding atom. The positions of H atoms for NH groups were determined from Fourier synthesis maps and verified through the hydrogen bonds parameters. Table S1 provides a summary of the crystallographic data together with refinement details for compounds. The geometric parameters are summarized in Table S2. The supplementary crystallographic data can be obtained free of charge via [www.ccdc.cam.ac.uk/conts/retrieving.html](http://www.ccdc.cam.ac.uk/conts/retrieving.html) (or from the Cambridge Crystallographic Data Centre, 12 Union Road, Cambridge CB2 1EZ, UK; fax: (+44) 1223-336-033; or [deposit@ccdc.cam.ac.uk](mailto:deposit@ccdc.cam.ac.uk)).

**Table S1.** Crystal data and details of data collection

| Parameter                                       | <b>1e</b>                                                                     | <b>1i</b>                                                      |
|-------------------------------------------------|-------------------------------------------------------------------------------|----------------------------------------------------------------|
| empirical formula                               | C <sub>16</sub> H <sub>16</sub> Cl <sub>2</sub> N <sub>2</sub> O <sub>3</sub> | C <sub>16</sub> H <sub>17</sub> FN <sub>2</sub> O <sub>3</sub> |
| <i>F</i> <sub>w</sub>                           | 355.21                                                                        | 304.31                                                         |
| space group                                     | <i>P</i> 2 <sub>1</sub> / <i>c</i>                                            | <i>P</i> 2 <sub>1</sub> / <i>c</i>                             |
| <i>a</i> [Å]                                    | 15.4951(11)                                                                   | 14.3054(9)                                                     |
| <i>b</i> [Å]                                    | 7.8815(5)                                                                     | 7.8734(4)                                                      |
| <i>c</i> [Å]                                    | 15.5152(12)                                                                   | 15.509(2)                                                      |
| <i>α</i> [°]                                    | 90                                                                            | 90                                                             |
| <i>β</i> [°]                                    | 117.006(9)                                                                    | 117.591(6)                                                     |
| <i>γ</i> [°]                                    | 90                                                                            | 90                                                             |
| <i>V</i> [Å <sup>3</sup> ]                      | 1688.2(2)                                                                     | 1548.1(2)                                                      |
| <i>Z</i>                                        | 4                                                                             | 4                                                              |
| <i>r</i> <sub>calcd</sub> [g·cm <sup>-3</sup> ] | 1.398                                                                         | 1.306                                                          |
| Crystal size [mm]                               | 0.25 × 0.20 × 0.10                                                            | 0.30 × 0.20 × 0.10                                             |
| <i>T</i> [K]                                    | 293                                                                           | 293                                                            |
| <i>μ</i> [mm <sup>-1</sup> ]                    | 0.400                                                                         | 0.099                                                          |
| 2 $\Theta$ range [°]                            | 5.258 to 50.054                                                               | 3.212 to 50.054                                                |
| Reflections collected                           | 7201                                                                          | 8594                                                           |
| Independent reflections                         | 2989[ <i>R</i> <sub>int</sub> =0.0321]                                        | 2699[ <i>R</i> <sub>int</sub> =0.0257]                         |
| Data/restraints/paramet                         | 2989/0/211                                                                    | 2699/0/202                                                     |
| <i>R</i> <sub>1</sub> <sup>[a]</sup>            | 0.0470                                                                        | 0.0499                                                         |
| <i>wR</i> <sub>2</sub> <sup>[b]</sup>           | 0.1121                                                                        | 0.1245                                                         |
| GOF <sup>[c]</sup>                              | 1.020                                                                         | 1.020                                                          |
| Largest diff. peak/hole                         | 0.25/-0.30                                                                    | 0.20/-0.18                                                     |
| CCDC No.                                        | 2097685                                                                       | 2097687                                                        |

<sup>a</sup>  $R_1 = \Sigma ||F_o| - |F_c|| / \Sigma |F_o|$ . <sup>b</sup>  $wR_2 = \{\Sigma [w(F_o^2 - F_c^2)^2] / \Sigma [w(F_o^2)^2]\}^{1/2}$ . <sup>c</sup> GOF =  $\{\Sigma [w(F_o^2 - F_c^2)^2] / (n - p)\}^{1/2}$ , where *n* is the number of reflections and *p* is the total number of parameters refined.

**Table S2.** Bond distances (Å) and angles(°).

| Compound <b>1e</b> . |          |
|----------------------|----------|
| O1-C9                | 1.418(3) |
| O2-C4                | 1.377(3) |
| O2-C8                | 1.429(3) |
| O3-C3                | 1.368(3) |
| O3-C7                | 1.427(3) |
| N1-N2                | 1.370(3) |
| N1-C10               | 1.274(3) |
| N2-C11               | 1.387(3) |
| C1-C2                | 1.392(3) |
| C1-C6                | 1.396(3) |
| C1-C10               | 1.458(3) |
| C2-C3                | 1.379(3) |
| C3-C4                | 1.395(3) |
| C4-C5                | 1.385(3) |

|         |          |
|---------|----------|
| C5-C6   | 1.383(3) |
| C11-C12 | 1.390(3) |
| C11-C16 | 1.388(3) |
| C12-C13 | 1.384(3) |
| C13-C14 | 1.370(4) |
| C14-C15 | 1.369(4) |
| C15-C16 | 1.382(3) |

|             |          |
|-------------|----------|
| O3-C3-C2    | 124.9(2) |
| O3-C3-C4    | 114.7(2) |
| C2-C3-C4    | 120.4(2) |
| O2-C4-C3    | 120.8(2) |
| O2-C4-C5    | 119.4(2) |
| C5-C4-C3    | 119.6(2) |
| O1-C5-C4    | 114.6(2) |
| O1-C5-C6    | 124.9(2) |
| C6-C5-C4    | 120.5(2) |
| C5-C6-C1    | 119.7(2) |
| N1-C10-C1   | 122.4(2) |
| N2-C11-C12  | 120.3(2) |
| N2-C11-C16  | 122.0(2) |
| C16-C11-C12 | 117.7(2) |
| C11-C12-Cl1 | 119.5(2) |
| C13-C12-Cl1 | 118.8(2) |
| C13-C12-C11 | 121.7(3) |
| C14-C13-C12 | 119.0(3) |
| C13-C14-Cl2 | 119.3(3) |
| C15-C14-Cl2 | 120.0(3) |
| C15-C14-C13 | 120.7(3) |
| C14-C15-C16 | 120.1(3) |
| C15-C16-C11 | 120.7(3) |

**Compound 1i.**

|        |          |
|--------|----------|
| F1-C12 | 1.359(3) |
| O1-C5  | 1.369(2) |
| O1-C9  | 1.426(3) |
| O2-C4  | 1.378(2) |
| O2-C8  | 1.425(3) |
| O3-C3  | 1.363(2) |
| O3-C7  | 1.424(3) |
| N1-N2  | 1.366(2) |
| N1-C10 | 1.276(2) |
| N2-C11 | 1.381(3) |
| C1-C2  | 1.392(3) |
| C1-C6  | 1.391(3) |
| C1-C10 | 1.459(3) |
| C2-C3  | 1.379(3) |
| C3-C4  | 1.398(3) |

|         |          |
|---------|----------|
| C4-C5   | 1.389(3) |
| C5-C6   | 1.381(3) |
| C11-C12 | 1.377(3) |
| C11-C16 | 1.385(3) |
| C12-C13 | 1.373(4) |
| C13-C14 | 1.362(5) |
| C14-C15 | 1.372(5) |
| C15-C16 | 1.383(4) |

|             |            |
|-------------|------------|
| C6-C1-C10   | 117.98(18) |
| C3-C2-C1    | 120.29(19) |
| O3-C3-C2    | 125.13(19) |
| O3-C3-C4    | 115.09(18) |
| C2-C3-C4    | 119.77(18) |
| O2-C4-C3    | 120.31(18) |
| O2-C4-C5    | 119.73(19) |
| C5-C4-C3    | 119.71(19) |
| O1-C5-C4    | 114.65(19) |
| O1-C5-C6    | 124.94(19) |
| C6-C5-C4    | 120.41(19) |
| C5-C6-C1    | 119.81(19) |
| N1-C10-C1   | 122.41(19) |
| N2-C11-C16  | 123.4(2)   |
| C12-C11-N2  | 119.4(2)   |
| C12-C11-C16 | 117.2(2)   |
| F1-C12-C11  | 117.5(2)   |
| F1-C12-C13  | 119.4(3)   |
| C13-C12-C11 | 123.1(3)   |
| C14-C13-C12 | 118.4(3)   |
| C13-C14-C15 | 120.6(3)   |
| C14-C15-C16 | 120.3(3)   |
| C15-C16-C11 | 120.3(3)   |

The crystal is built-up from two-dimensional wave-like layers formed through the packing of supramolecular chains developing parallel to 110 plane. A partial diagram of the crystal packing viewed along *a* axis is shown in Figure S2.

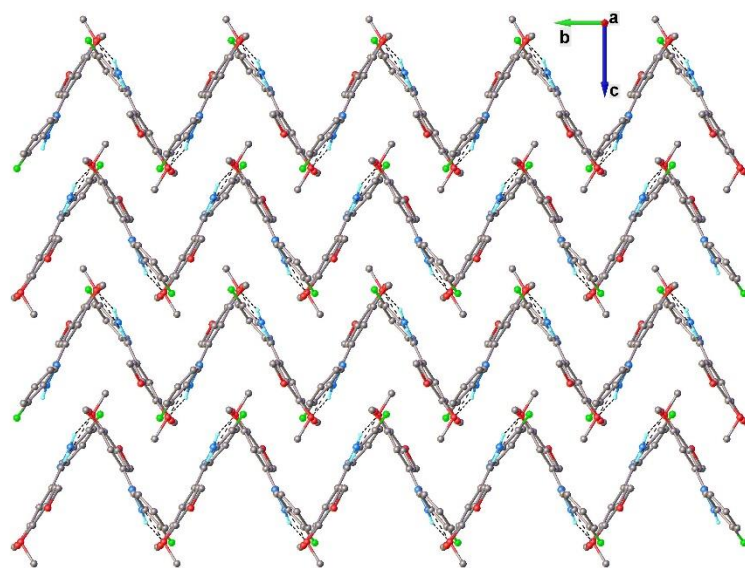

**Figure S2.** View of the crystal packing for **1i** along *a* axis.

National Cancer Institute (NCI) - One Dose Mean Graph for hydrazones **1c**, **1d**, **1i**, **1k** and **1l**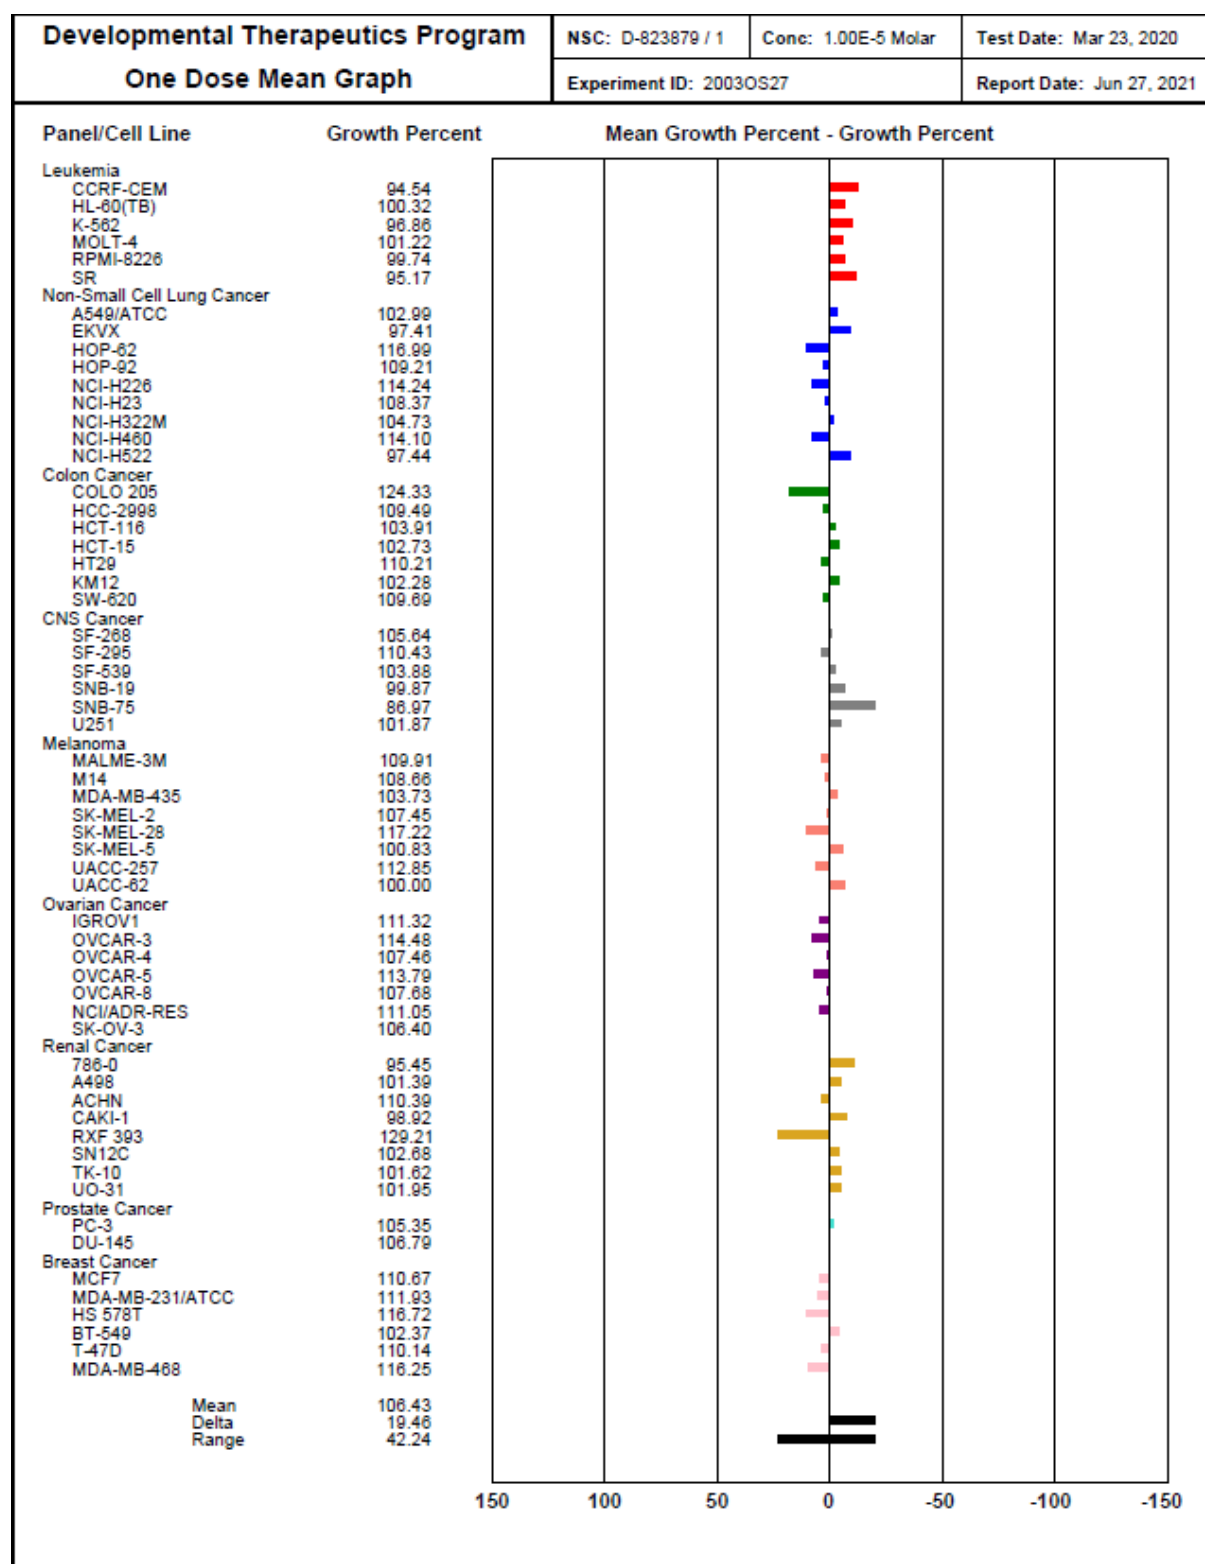

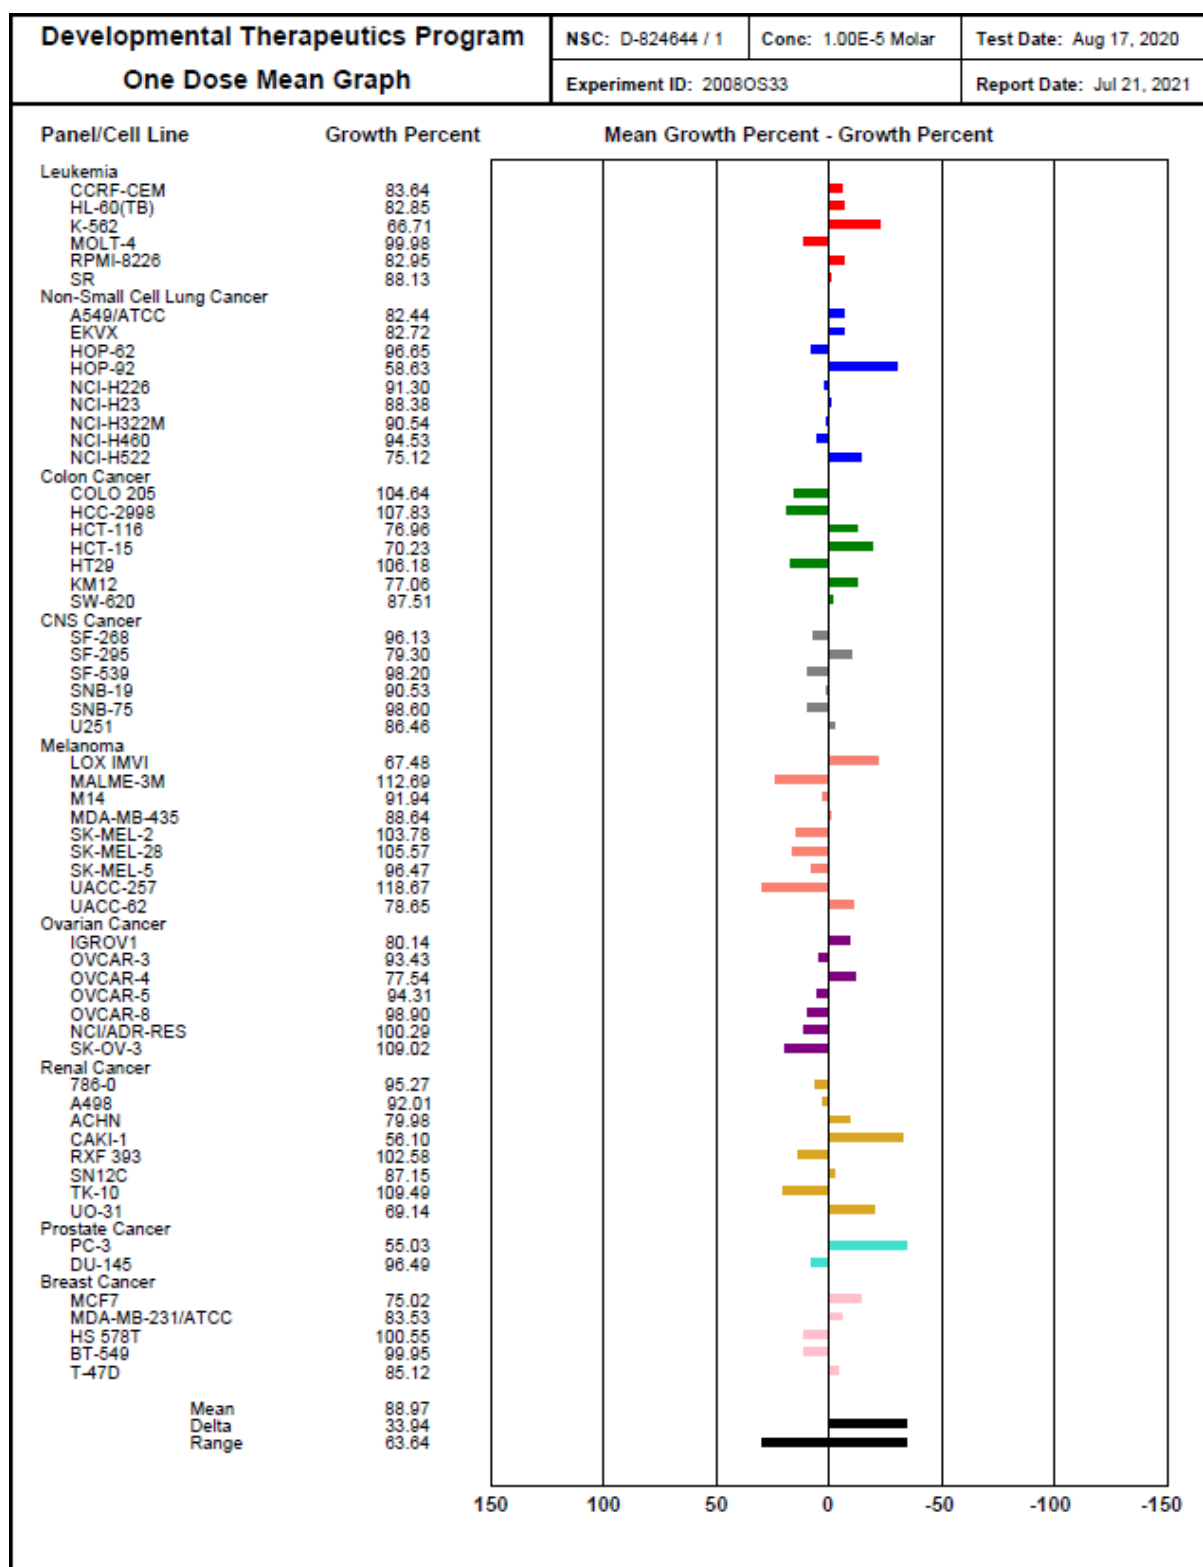



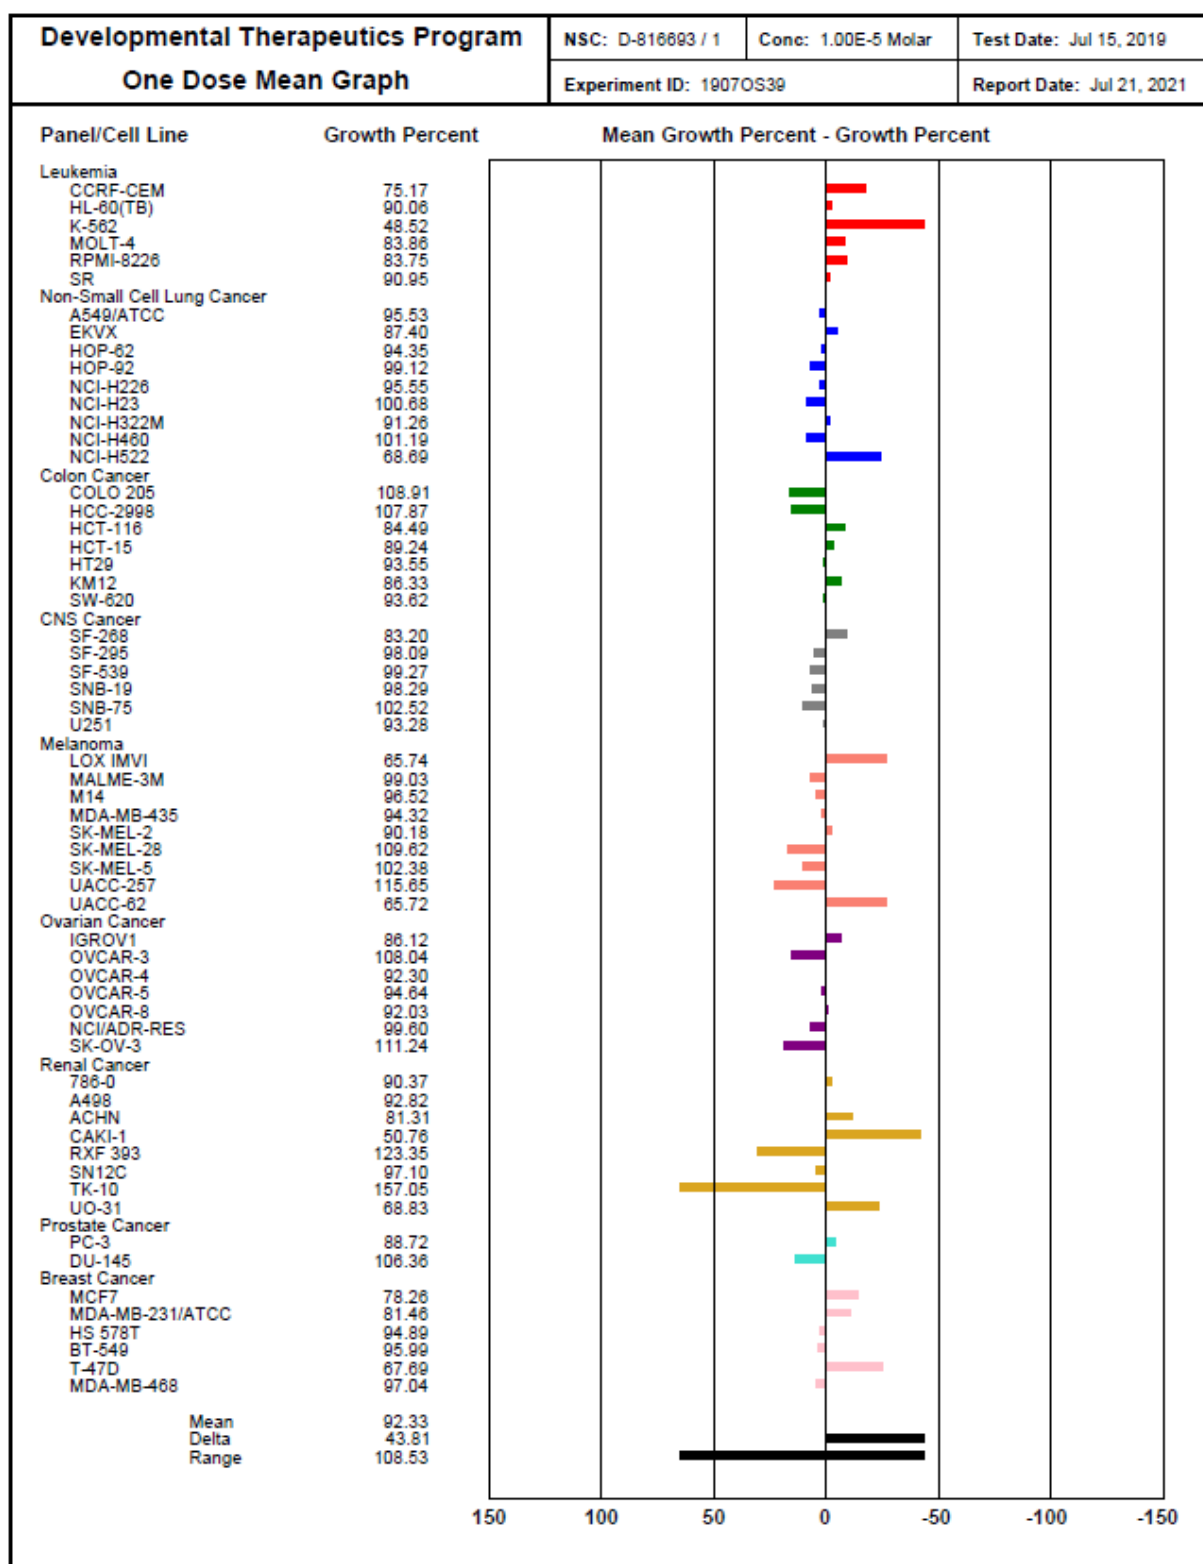

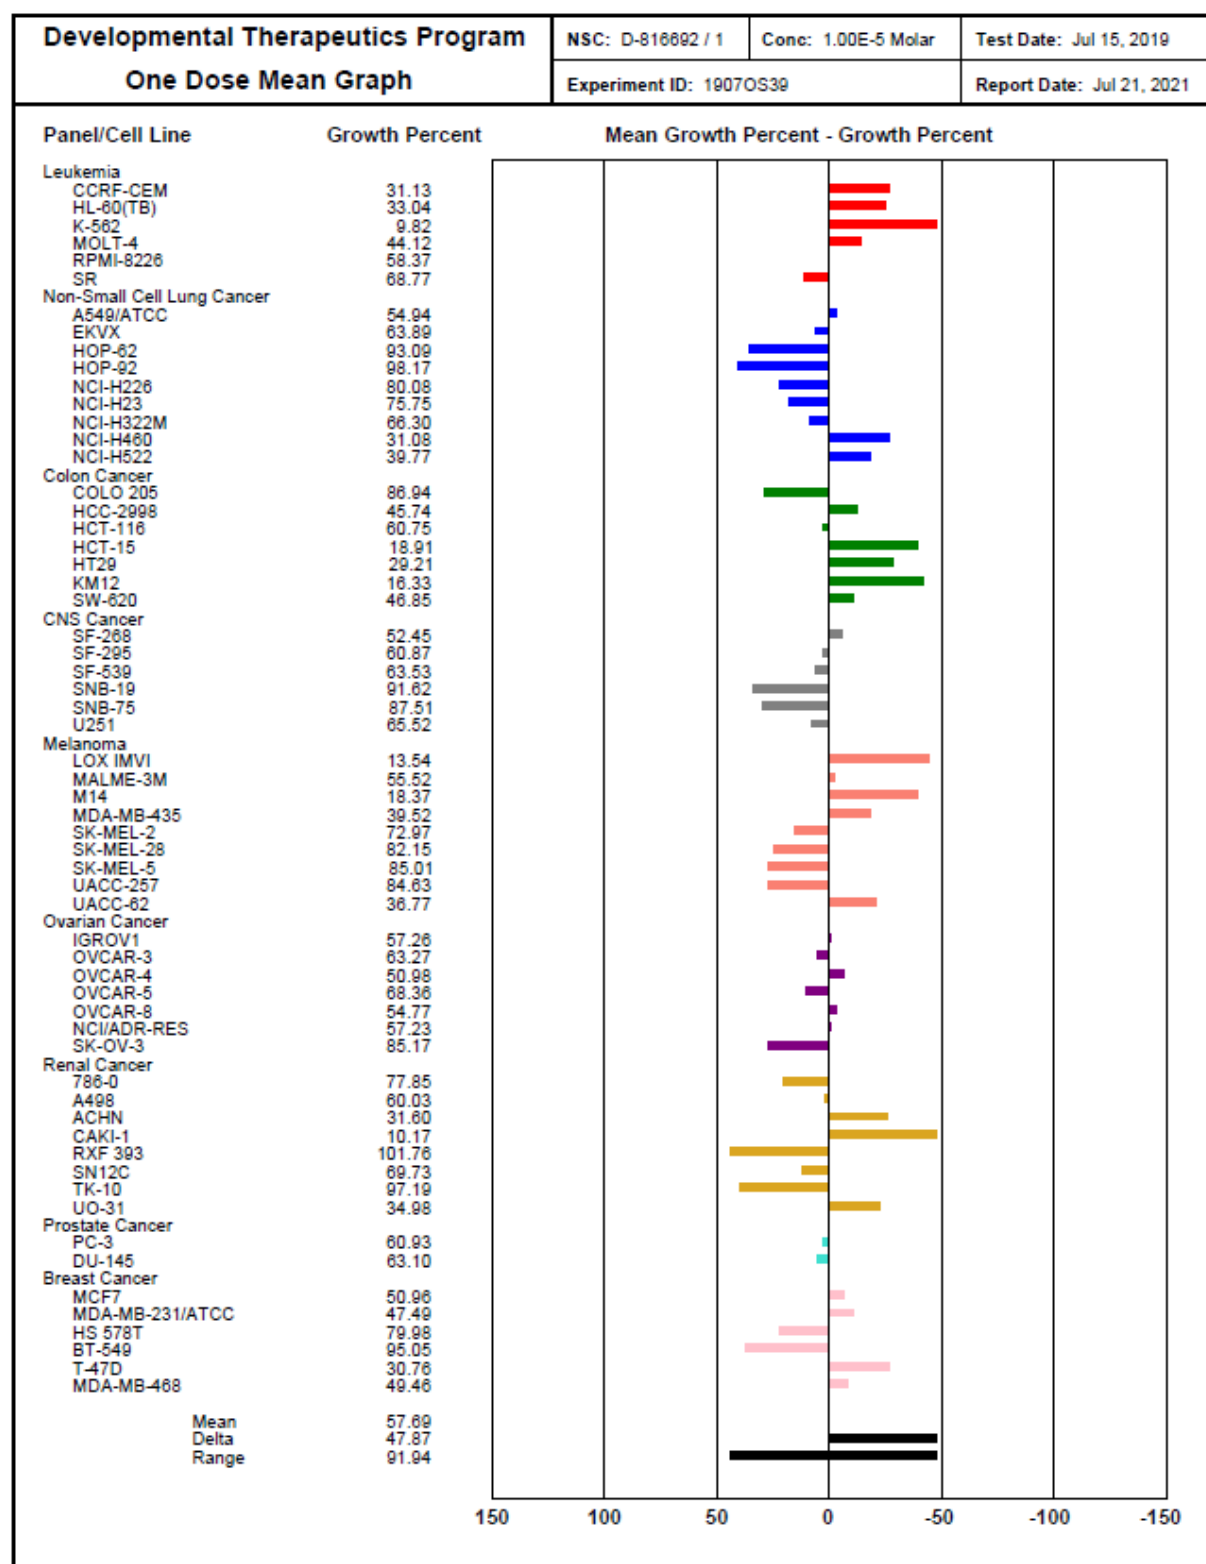

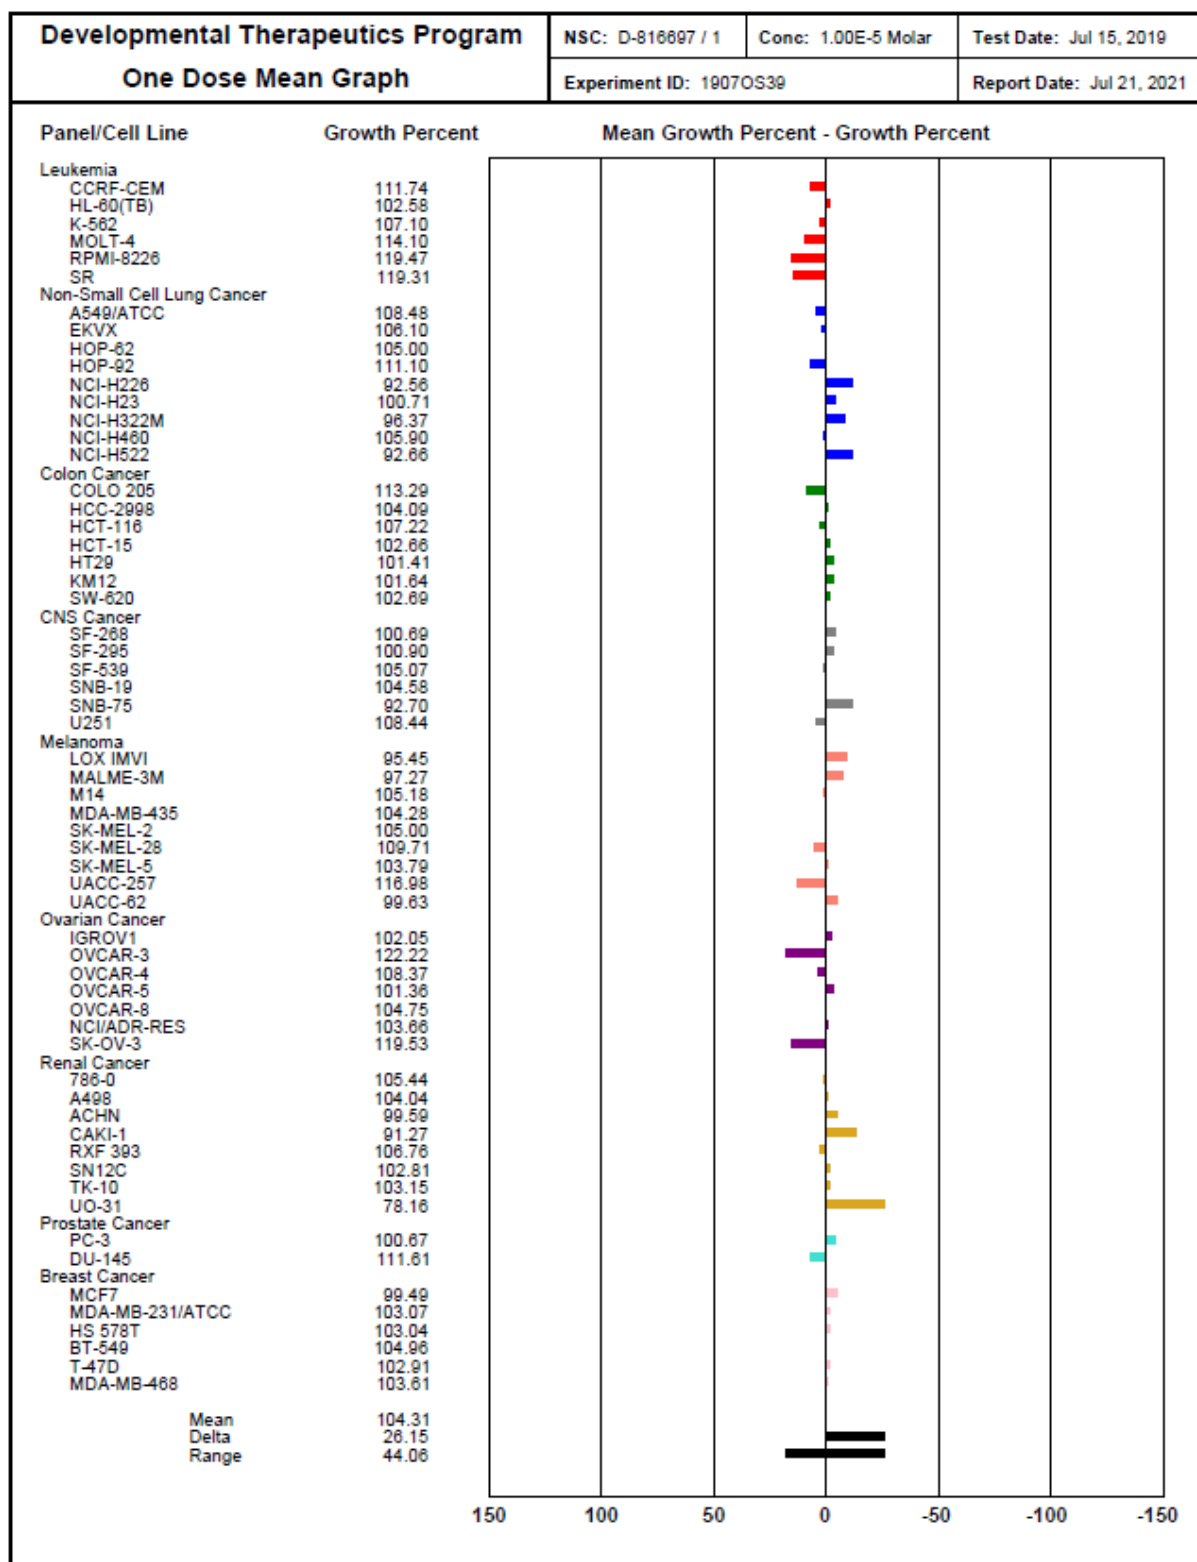

## References

- [1] Rigaku Oxford Diffraction, **2015**, CrysAlisPro Software system, version 1.171.38.46, Rigaku Corporation, Oxford, UK.
- [2] Dolomanov, O. V.; Bourhis, L. J.; Gildea, R. J.; Howard, J. A. K.; Puschmann, H. *J. Appl. Crystallogr.* **2009**, *42*, 339.
- [3] Sheldrick, G. *Acta Cryst. A* **2015**, *71*, 3.

[4] Sheldrick, G. *Acta Cryst. C* **2015**, 71, 3.
